# Supplementary material for: Acid-Induced Type VI Secretion System Is Regulated by ExoR-ChvG/ChvI Signaling Cascade in Agrobacterium tumefaciens
Source: PubMed Central journal article supplement (PMC3460628; doi:10.1371/journal.ppat.1002938), 2012-09-27
Supplement: ppat.1002938.s008.pdf [file ppat.1002938.s008.pdf]

1 TABLE S1. Bacterial strains and plasmids

| Strain or plasmid                    | Relevant characteristics                                                                                            | Source or Reference |
|--------------------------------------|---------------------------------------------------------------------------------------------------------------------|---------------------|
| <i>A. tumefaciens</i> strains        |                                                                                                                     |                     |
| C58                                  | Wild-type virulent strain containing nopaline-type Ti plasmid pTiC58                                                | Eugene Nester       |
| Ach5                                 | Wild-type virulent strain containing octopine-type Ti plasmid pTiAch5                                               | [1]                 |
| 1D1609                               | Wild-type virulent strain containing octopine-type Ti plasmid pTi1D1609                                             | [2]                 |
| EML1226                              | <i>chvG</i> in-frame deletion mutant, C58 $\Delta$ <i>chvG</i>                                                      | This study          |
| EML3682                              | <i>chvI</i> in-frame deletion mutant, C58 $\Delta$ <i>chvI</i>                                                      | This study          |
| EML1654                              | <i>exoR</i> in-frame deletion mutant, C58 $\Delta$ <i>exoR</i>                                                      | This study          |
| EML2104                              | <i>exoR chvG</i> in-frame deletion mutant, C58 $\Delta$ <i>chvG</i> $\Delta$ <i>exoR</i>                            | This study          |
| <i>E. coli</i> strains               |                                                                                                                     |                     |
| DH10B                                | Host for DNA cloning                                                                                                | Invitrogen          |
| BL21(DE3)                            | Host for overexpressing proteins driven by T7 promoter                                                              | [3]                 |
| <i>S. cerevisiae</i> AH109           | Host for yeast two-hybrid analysis                                                                                  | Clontech            |
| Plasmids                             |                                                                                                                     |                     |
| pRL662                               | Gm <sup>r</sup> , broad-host-range vector derived from pBBR1MCS-2                                                   | [4]                 |
| pTrc200                              | Sm <sup>r</sup> Sp <sup>r</sup> , pSV1 origin <i>lacI<sup>r</sup></i> , <i>trc</i> promoter expression vector       | [5]                 |
| pET22b(+)                            | Ap <sup>R</sup> , overexpression vector to generate C-terminal His-tagged protein driven by T7 promoter             | Novagen             |
| pET28a                               | Km <sup>r</sup> , overexpression vector to generate N-terminal His-tagged protein driven by T7 promoter             | Novagen             |
| pJQ200SK                             | Gm <sup>r</sup> , suicide plasmid containing Gm <sup>r</sup> and <i>sacB</i> gene for selection of double crossover | [6]                 |
| pBluescript SK(+)-HA                 | pBluescriptsk+::HA for HA epitope tagging vector                                                                    | This study          |
| pGADT7                               | Ap <sup>r</sup> , AD vector used in yeast two-hybrid assay                                                          | Clontech            |
| pGBKT7                               | Km <sup>r</sup> , DNA-BD vector used in yeast-two hybrid assay                                                      | Clontech            |
| pJQ200SK- $\Delta$ <i>chvG</i>       | Gm <sup>r</sup> , used in generating entire <i>chvG</i> deletion mutant of <i>A. tumefaciens</i> C58                | This study          |
| pJQ200SK- $\Delta$ <i>chvI</i>       | Gm <sup>r</sup> , used in generating entire <i>chvI</i> deletion mutant of <i>A. tumefaciens</i> C58                | This study          |
| pJQ200SK- $\Delta$ <i>exoR</i>       | Gm <sup>r</sup> , used in generating entire <i>exoR</i> deletion mutant of <i>A. tumefaciens</i> C58                | This study          |
| pJQ200SK- $\Delta$ <i>exoR-strep</i> | Gm <sup>r</sup> , used in generating entire <i>exoR</i> replacement with <i>exoR-strep</i> of <i>A.</i>             | This study          |

| <i>tumefaciens</i> C58 |                                                                                             |            |
|------------------------|---------------------------------------------------------------------------------------------|------------|
| pET28a-ChvI            | Km <sup>r</sup> , pET28a expressing His-ChvI                                                | This study |
| pET28a-ChvI D52E       | Km <sup>r</sup> , pET28a expressing His-ChvI with D52E substitution                         | This study |
| pChvG                  | Gm <sup>r</sup> , pRL662 expressing ChvG driven by <i>lacZp</i>                             | This study |
| pChvI                  | Gm <sup>r</sup> , pRL662 expressing ChvI driven by <i>lacZp</i>                             | This study |
| pChvI D52E             | Gm <sup>r</sup> , pRL662 expressing ChvI with D52E substitution                             | This study |
| pChvI D52A             | Gm <sup>r</sup> , pRL662 expressing ChvI with D52A substitution                             | This study |
| pChvG-HA               | Gm <sup>r</sup> , pRL662 expressing ChvG-HA driven by <i>lacZp</i>                          | This study |
| pChvI-ChvG-HA          | Gm <sup>r</sup> , pRL662 expressing ChvI-ChvG-HA driven by native protomotor                | This study |
| pExoR                  | Sm <sup>r</sup> Sp <sup>r</sup> , pTrc200 expressing ExoR driven by <i>trc</i> promoter     | This study |
| pExoR G73C             | Sm <sup>r</sup> Sp <sup>r</sup> , pTrc200 expressing ExoR with G73C substitution            | This study |
| pExoR S153Y            | Sm <sup>r</sup> Sp <sup>r</sup> , pTrc200 expressing ExoR with S153Y substitution           | This study |
| pExoR G73C S153Y       | Sm <sup>r</sup> Sp <sup>r</sup> , pTrc200 expressing ExoR with G73C and S153Y substitutions | This study |
| pGBKT7-ChvG-peri       | Km <sup>r</sup> , DNA-BD vector expressing ChvG periplasmic domain                          | This study |
| pGBKT7-53              | Km <sup>r</sup> , DNA-BD vector expressing murine p53                                       | Clontech   |
| pGADT7-ExoR            | Ap <sup>r</sup> , AD vector expressing ExoR                                                 | This study |
| pGADT7-ExoR G73C       | Ap <sup>r</sup> , AD vector expressing ExoR G73C                                            | This study |
| pGADT7-ExoR S153Y      | Ap <sup>r</sup> , AD vector expressing ExoR S153Y                                           | This study |
| pGADT7-ExoR G73C S153Y | AP <sup>r</sup> , AD vector expressing ExoR G73C S153Y                                      | This study |
| pGADT7-T               | Ap <sup>r</sup> , AD vector expressing SV40 large T-antigen                                 | Clontech   |

1  
2  
3

1 **References**

- 2 1. Lin BC, Kado CI (1977) Studies on *Agrobacterium tumefaciens*. VIII. Avirulence  
3 induced by temperature and ethidium bromide. Canadian Journal of  
4 Microbiology 23: 1554-1561.
- 5 2. Palumbo JD, Phillips DA, Kado CI (1998) Characterization of a new *Agrobacterium*  
6 *tumefaciens* strain from alfalfa. Arch Microbiol 169: 381-386.
- 7 3. Studier FW, Rosenberg AH, Dunn JJ, Dubendorff JW (1990) Use of T7 RNA  
8 polymerase to direct expression of cloned genes. Methods Enzymol 185:  
9 60-89.
- 10 4. Vergunst A, Schrammeijer B, den Dulk-Ras A, de Vlaam C, Regensburg-Tuink T, et  
11 al. (2000) VirB/D4-dependent protein translocation from *Agrobacterium* into  
12 plant cells. SCIENCE 290: 979-982.
- 13 5. Schmidt-Eisenlohr H, Domke N, Baron C (1999) TraC of IncN plasmid pKM101  
14 associates with membranes and extracellular high-molecular-weight  
15 structures in *Escherichia coli*. Journal of Bacteriology 181: 5563-5571.
- 16 6. Quandt J, Hynes MF (1993) Versatile suicide vectors which allow direct selection  
17 for gene replacement in gram-negative bacteria. Gene 127: 15-21.

18

19

20
