# Supplementary material for: Acid-Induced Type VI Secretion System Is Regulated by ExoR-ChvG/ChvI Signaling Cascade in Agrobacterium tumefaciens
Source: PubMed Central journal article supplement (PMC3460628; doi:10.1371/journal.ppat.1002938), 2012-09-27
Supplement: ppat.1002938.s009.pdf [file ppat.1002938.s009.pdf]

1 TABLE S2. Primers used in this study

| Primer            | Sequence (5'-3')                                  | Application          |
|-------------------|---------------------------------------------------|----------------------|
| ChvG up F         | GCTCTAGAGAAGGATGAGGAGATCGACG                      | <i>chvG</i> deletion |
| ChvG up R         | CGGGATCCCAACACGTATTAAGTCCCTCAC                    | <i>chvG</i> deletion |
| ChvG down F       | CGGGATCCCGCTGAACGCTTCAACCTGC                      | <i>chvG</i> deletion |
| ChvG down R       | TCCCCCGGGCCTGTCCATCGGTGGGATTTTC                   | <i>chvG</i> deletion |
| ChvI up F         | GCTCTAGAGATGGTGTTTTCGGTGGAAGC                     | <i>chvI</i> deletion |
| ChvI up R         | CGGGATCCCTGCATGTAGTTGGTCTCCATC                    | <i>chvI</i> deletion |
| ChvI down F       | CGGGATCCGCTTAAAGAAGCCGACTCAAG                     | <i>chvI</i> deletion |
| ChvI down R       | TCCCCCGGGAACAGATTGGCATCGGCATCG                    | <i>chvI</i> deletion |
| ExoR up F         | GCTCTAGAATGCGCGACTATGATTCCTGC                     | <i>exoR</i> deletion |
| ExoR up R         | CGGGATCCAGCATTTCGGCGAACTTCTC                      | <i>exoR</i> deletion |
| ExoR down F       | CGGGATCCGATTGAGAATGCCGGTCGGGAC                    | <i>exoR</i> deletion |
| ExoR down R       | TCCCCCGGGGCCCTCCGCAAACCTGAAAAATC                  | <i>exoR</i> deletion |
| ExoR-strep down F | TGAGAATGCCGGTCGGGACGGTTTCA                        | <i>exoR-strep</i>    |
|                   |                                                   | replacement          |
| ExoR-strep down R | TGAAACCGTCCCGACCGCATTCTCACTTTTCGAACTGCGGGTGGCTCCA | <i>exoR-strep</i>    |
|                   | ATCCGGATCGTTGAACTGCATG                            | replacement          |
| ExoR-strep F      | CTCTCGCCGGTGAACGACC                               | confirmation         |
| ExoR-strep R      | GCTCTAGATCGGCTGAACCGTTGCTGTC                      | confirmation         |
| T6SS F            | GGGGTACCGACATGCAATGAGCCTCCTGC                     | EMSA                 |
| T6SS R            | CCGCTCGAGGAGTAGTCTATCCCCAGAAAATAG                 | EMSA                 |
| Atu4353 F         | TCCGCATCCATGGGAATAGC                              | EMSA                 |
| Atu4353 R         | CGGGATCCCTCCGTCGCGTATATCCACG                      | EMSA                 |
| PET28a-ChvI F     | AAACATATGCAGACGATCGCGTTGTC                        | Purification         |
| PET28a-ChvI R     | CCGCTCGAGTTAAGCCGTTTCGCGGAAG                      | Purification         |
| ChvG F            | CCGCTCGAGGAAGCCGACTCAAGCAGAAG                     | overexpression       |
| ChvG R            | GCTCTAGAGGTCGCATGCAGTTGAAGC                       | overexpression       |
| ChvI F            | CCGCTCGAGAACCTGGCTGGGTGAATGTGC                    | overexpression       |
| ChvI R            | GCTCTAGAGGTCCTTCTGCTTGAGTGC                       | overexpression       |
| ChvG-HA F         | GGAGCTCCCGCTCGAGGAAGCCGACTCAAGCAGAAG              | overexpression       |
| ChvG-HA R         | GCTCTAGAGCGTTCATGGGTTTCGGCCG                      | overexpression       |
| ChvI-ChvG-HA F    | GCTCTAGAGAGCCTGACTTTAAAAAAGTCTAG                  | overexpression       |
| ChvI-ChvG-HA R    | CCGCTCGAGTCAAGCGTAATCTGGAACATCGTATGGGTAGCGTTCATGG | overexpression       |
|                   | GTTTCGGCCG                                        |                      |
| ExoR F            | GCCCCGGAGTGAGAGAAGTTCGCCGAAATGC                   | overexpression       |
| ExoR R            | GATTCTAGATCAATCCGGATCGTTGAACTGC                   | overexpression       |
| ChvI D52E F       | GCTTGCCATTTTCGAAATTAAGATGC                        | mutagenesis          |

|               |                                      |                |
|---------------|--------------------------------------|----------------|
| ChvI D52E R   | GCATCTTAAT <b>TT</b> CGAAAAATGGCAAGC | mutagenesis    |
| ChvI D52A F   | GCTTGCCATTT <b>TCGCT</b> TATTAAGATGC | mutagenesis    |
| ChvI D52A R   | GCATCTTAAT <b>AGCG</b> AAAAATGGCAAGC | mutagenesis    |
| ExoR G73C F   | AGGGCCATACCT <b>TGCT</b> CGCGCTGG    | mutagenesis    |
| ExoR G73C R   | CCAGCGCGAG <b>GCAGG</b> TATGGCCCT    | mutagenesis    |
| ExoR S153Y F  | CCAGGTGGCT <b>TACAC</b> TTTGCGCTG    | mutagenesis    |
| ExoR S153Y R  | CACGCCAAAGGT <b>GTA</b> AGCCACCTGG   | mutagenesis    |
| icmF F        | CGGTTGTTCAAGGACGTCATC                | qRT-PCR        |
| icmF R        | GCGGATACGGCATAAGCAAT                 | qRT-PCR        |
| fhaI F        | GCGACCACGAACATAACCGAT                | qRT-PCR        |
| fhaI R        | GACCGGACGTGAGATCATGAC                | qRT-PCR        |
| atu4343 F     | TTCTTT <b>CGGT</b> TGCGCGTTAC        | qRT-PCR        |
| atu4343 R     | GAACCAGCGTTTCGATGGAG                 | qRT-PCR        |
| clpV F        | AGACGTTGCCAGAGCGGTTA                 | qRT-PCR        |
| clpV R        | ACAGAAGGTGTCGCTCGCTT                 | qRT-PCR        |
| hep F         | CGTTCGACGACAACAACCTCG                | qRT-PCR        |
| hep R         | GTCGCCAGATCGTAGGAAGC                 | qRT-PCR        |
| atu4349 F     | GAAAGCTGCGATGTTGCATTC                | qRT-PCR        |
| atu4349 R     | GGTGGAGTATTCGCTTTCAGGA               | qRT-PCR        |
| 16S F         | ACCCATCTCTGCGGAATAGCT                | qRT-PCR        |
| 16S R         | GCTCATCCATCCCCGATAAAT                | qRT-PCR        |
| 23S F         | CGTCTCTGCTCGACTTGTCACT               | qRT-PCR        |
| 23S R         | AATCGGTCGTCGAGTGCAAT                 | qRT-PCR        |
| chvH F        | TCCATTACGAAGGCAATCC                  | qRT-PCR        |
| chvH R        | ACGATTTCCAGCGTGACATG                 | qRT-PCR        |
| BD ChvGperi F | GAACATATGGAAGGGCTGATCGACGCGCGCTG     | Yeast 2 hybrid |
| BD ChvGperi R | CCGCTCGAGCGGCTCGGCATGCACGATCTTG      | Yeast 2 hybrid |
| AD ExoR F     | GACGGATCCATCCGGATCGTTGAACTGCATG      | Yeast 2 hybrid |
| AD ExoR R     | GACGAATTCATCCGGATCGTTGAACTGCATG      | Yeast 2 hybrid |

1 <sup>a</sup>Restriction enzyme sites are underlined, and mutated sequences are indicated by  
2 bold type.

3
